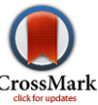

## Correction

# Correction: Long Non-Coding RNA and Alternative Splicing Modulations in Parkinson's Leukocytes Identified by RNA Sequencing

The *PLOS Computational Biology* Staff

The images for Figures 2 and 3 are incorrectly switched. The image that appears as Figure 2 should be Figure 3, and the image that appears as Figure 3 should be Figure 2. The figure legends appear in the correct order.

## Reference

1. Soreq L, Guffanti A, Salomonis N, Simchovitz A, Israel Z, et al. (2014) Long Non-Coding RNA and Alternative Splicing Modulations in Parkinson's Leukocytes Identified by RNA Sequencing. *PLoS Comput Biol* 10(3): e1003517. doi:10.1371/journal.pcbi.1003517

**Citation:** The *PLOS Computational Biology* Staff (2014) Correction: Long Non-Coding RNA and Alternative Splicing Modulations in Parkinson's Leukocytes Identified by RNA Sequencing. *PLoS Comput Biol* 10(5): e1003647. doi:10.1371/journal.pcbi.1003647

**Published:** May 16, 2014

**Copyright:** © 2014 The *PLOS Computational Biology* Staff. This is an open-access article distributed under the terms of the Creative Commons Attribution License, which permits unrestricted use, distribution, and reproduction in any medium, provided the original author and source are credited.
